# Supplementary material for: BET inhibitor OTX015 targets BRD2 and BRD4 and decreases c-MYC in acute leukemia cells
Source: PubMed Central journal article supplement (PMC4627339; doi:10.18632/oncotarget.4131), 2015-05-14
Supplement: oncotarget-06-17698-s001.pdf [file oncotarget-06-17698-s001.pdf]

**BET inhibitor OTX015 targets BRD2 and BRD4 and decreases c-MYC in acute leukemia cells**

**Supplementary Material**

**Supp Table 1: RT-qPCR primers and probes.**

| <b>TAQMAN®</b>      |                |                                            |
|---------------------|----------------|--------------------------------------------|
| <b>c-MYC</b>        | Forward primer | 5'-GGATTTTTTTTCGGGTTAGTGGAA-3'             |
|                     | Reverse primer | 5'-TTCCTGTTGGTGAAGCTAACGTT-3'              |
|                     | Probe          | 5'-FAM-CTCCCGCGACGATGCCCT-TAMRA-3'         |
| <b>BRD4</b>         | Forward primer | 5'-CCCTGAAGCCGTCCACACT-3'                  |
|                     | Reverse primer | 5'-TTCTCAGCTTGAGGTTTCCTTTTC-3'             |
|                     | Probe          | 5'-FAM CGCTATGTCACCTCCTGTTTGCGGA TAMRA-3'  |
| <b>BRD3</b>         | Forward primer | 5'-ACATGCAGAATGTGGTGGTGAA-3'               |
|                     | Reverse primer | 5'-CGTCCACGGGCTGGTAGA-3'                   |
|                     | Probe          | 5'-FAM ACGCTCTGAAACACCAGTTCGCCT TAMRA-3'   |
| <b>BRD2</b>         | Forward primer | 5'-CCCGACGAGATTGAAATCGA-3'                 |
|                     | Reverse primer | 5'-CCGCAAACAGGAGGTGACATA-3'                |
|                     | Probe          | 5'-FAM TTGAGACCCTGAAGCCGTCCACACTG TAMRA-3' |
| <b>ABL</b>          | Forward primer | 5'-TGGAGATAAACTCTAAGCATAACTAAAGGT-3'       |
|                     | Reverse primer | 5'-GATGTAGTTGCTTGGGACCCA-3'                |
|                     | Probe          | 5'-FAM CCATTTTTGGTTTGGGCTTCACACCATTAMRA-3' |
| <b>SYBER Green®</b> |                |                                            |
| <b>HEXIM1</b>       | Forward primer | 5'-AAGGACTAGCTAAAGGCGTCAC-3'               |
|                     | Reverse primer | 5'-TGGCTAGTAGAGTCCTCGAAGTTT-3'             |
| <b>c-MYC</b>        | Forward primer | 5'-CGACTCTGAGGAGGAACAAGAA-3'               |
|                     | Reverse primer | 5'-GGATAGTCCTTCCGAGTGGA-3'                 |
| <b>GAPDH</b>        | Forward primer | 5'-GATCCCTCCAAAATCAAGTGG-3'                |
|                     | Reverse primer | 5'-GGAGGCATTGCTGATGATCT-3'                 |

**Supp Table 2: Top ten of down- (negative logFC) and up regulated (positive logFC) genes after whole genome sequencing of K562 vs OCI-AML3 cells upon treatment with OTX015.**

| Position        | Gene Symbol | logFC         | P.Value              |
|-----------------|-------------|---------------|----------------------|
| TC01003403.hg.1 | SLAMF6      | -3.49147      | 5.89451118193039e-34 |
| TC01001640.hg.1 | PTPRC       | -2.6289666667 | 1.8535949882457e-29  |
| TC01003378.hg.1 | SPTA1       | -2.4937166667 | 9.28557583175231e-33 |
| TC02000623.hg.1 | IL18RAP     | -2.33878      | 2.1204427293552e-25  |
| TC01001987.hg.1 | C1orf100    | -2.1916       | 1.84952280601161e-20 |
| TC15000796.hg.1 | TM6SF1      | -2.13317      | 6.83392932074306e-18 |
| TC02000954.hg.1 | GALNT5      | -2.0946066667 | 1.07462730511599e-26 |
| TC06000647.hg.1 | TFAP2B      | -2.06752      | 1.02143852061162e-20 |
| TC14000902.hg.1 | RNASE1      | -2.0380533333 | 9.28053268825489e-23 |
| TC12001718.hg.1 | PTPRB       | -2.0196733333 | 6.4168889993847e-30  |
| TC15000945.hg.1 | ARRDC4      | 4.0546766667  | 6.08821172467652e-26 |
| TC17000796.hg.1 | SNORA38B    | 3.03333       | 2.64055457057049e-20 |
| TC07001562.hg.1 | HGF         | 2.27311       | 5.24878344845297e-23 |
| TC02002499.hg.1 | SCN9A       | 2.1551933333  | 4.75263267193313e-26 |
| TC18000554.hg.1 | BCL2        | 1.9623066667  | 1.72660433612918e-16 |
| TC11001368.hg.1 | OR2D2       | 1.8800366667  | 4.49844104394644e-12 |
| TC03001908.hg.1 | IGSF10      | 1.8667866667  | 1.11715012616426e-18 |
| TC07000780.hg.1 | RNA5SP243   | 1.86289       | 1.28876588216316e-09 |
| TC02001614.hg.1 | WDR35       | 1.7575266667  | 1.78750821933943e-17 |
| TC07001294.hg.1 | TARP        | 1.7279666667  | 2.54635607648742e-15 |

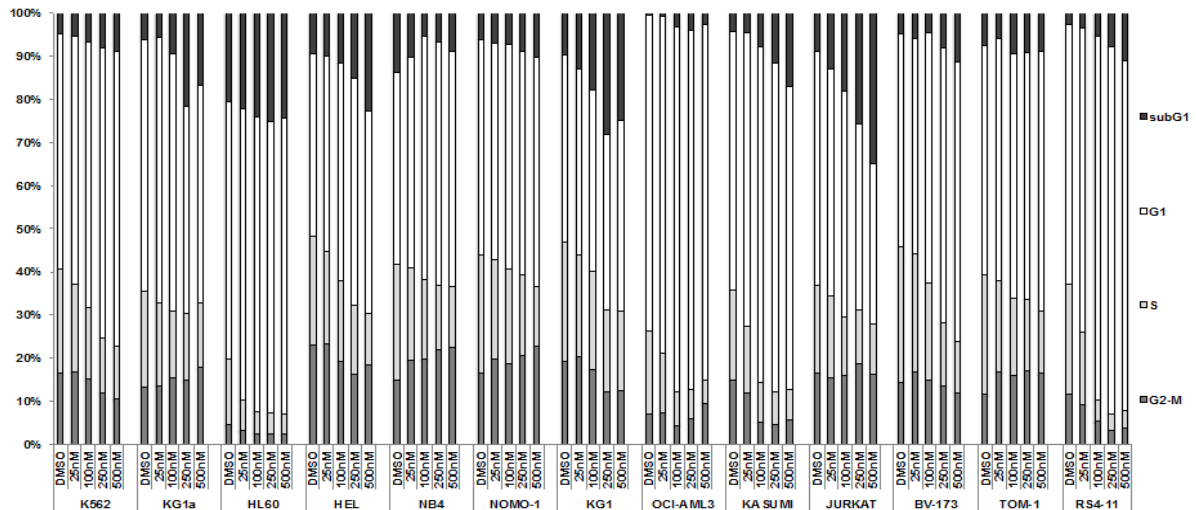

**Supp Figure 1: Effects of OTX015 on the cell cycle.** Cell cycle alterations at 48 h induced after OTX015 25 nM-500 nM in leukemia cell lines: X-axis, cell lines, Y-axis, cells in terms of percent cells in sub-G1, G1, S and G2/M phases. Results are shown as mean from duplicates of three independent experiments.

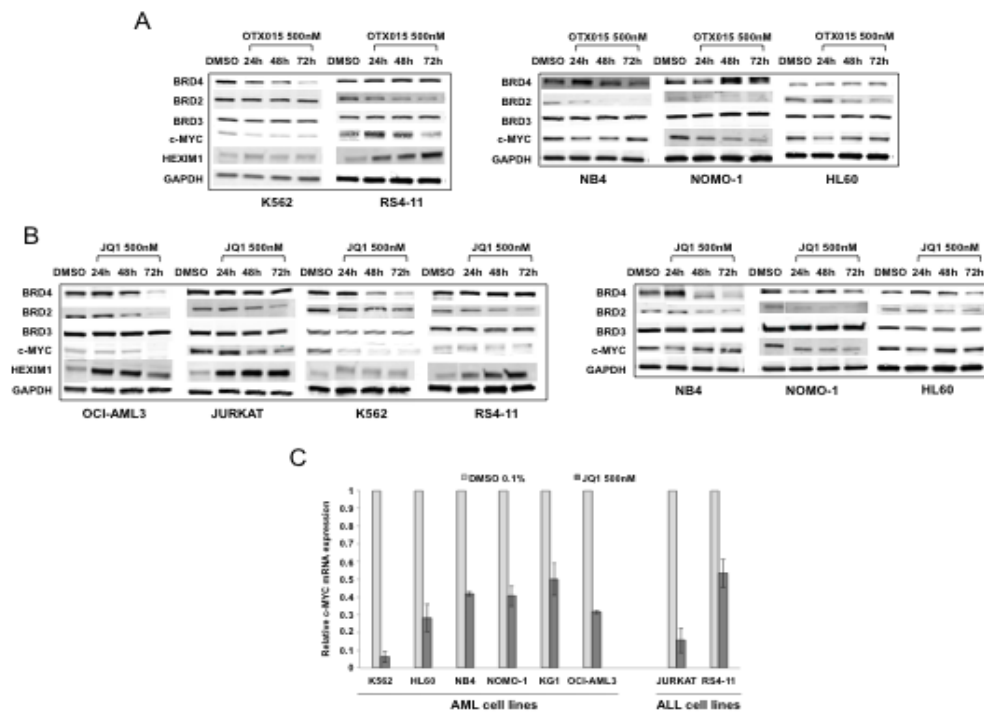

**Supp Figure 2: Effects of OTX015 and JQ1 on c-MYC, BRD2/3/4 and HEXIM1 protein expression and of JQ1 on c-MYC mRNA in AML and ALL cell lines.** Western blots showing BRD2/3/4, c-MYC and HEXIM1 expression in additional cell lines after treatment for 24, 48 or 72h with **(A)** 500nM OTX015, **(B)** 500nM JQ1, or 0.1% DMSO. GAPDH was used as a loading control. One representative experiment out of three is shown. **(C)** RT-qPCR showing c-MYC downregulation in AML and ALL cell lines after 48h exposure with 500nM JQ1, relative to GAPDH normalized to 0.1% DMSO.

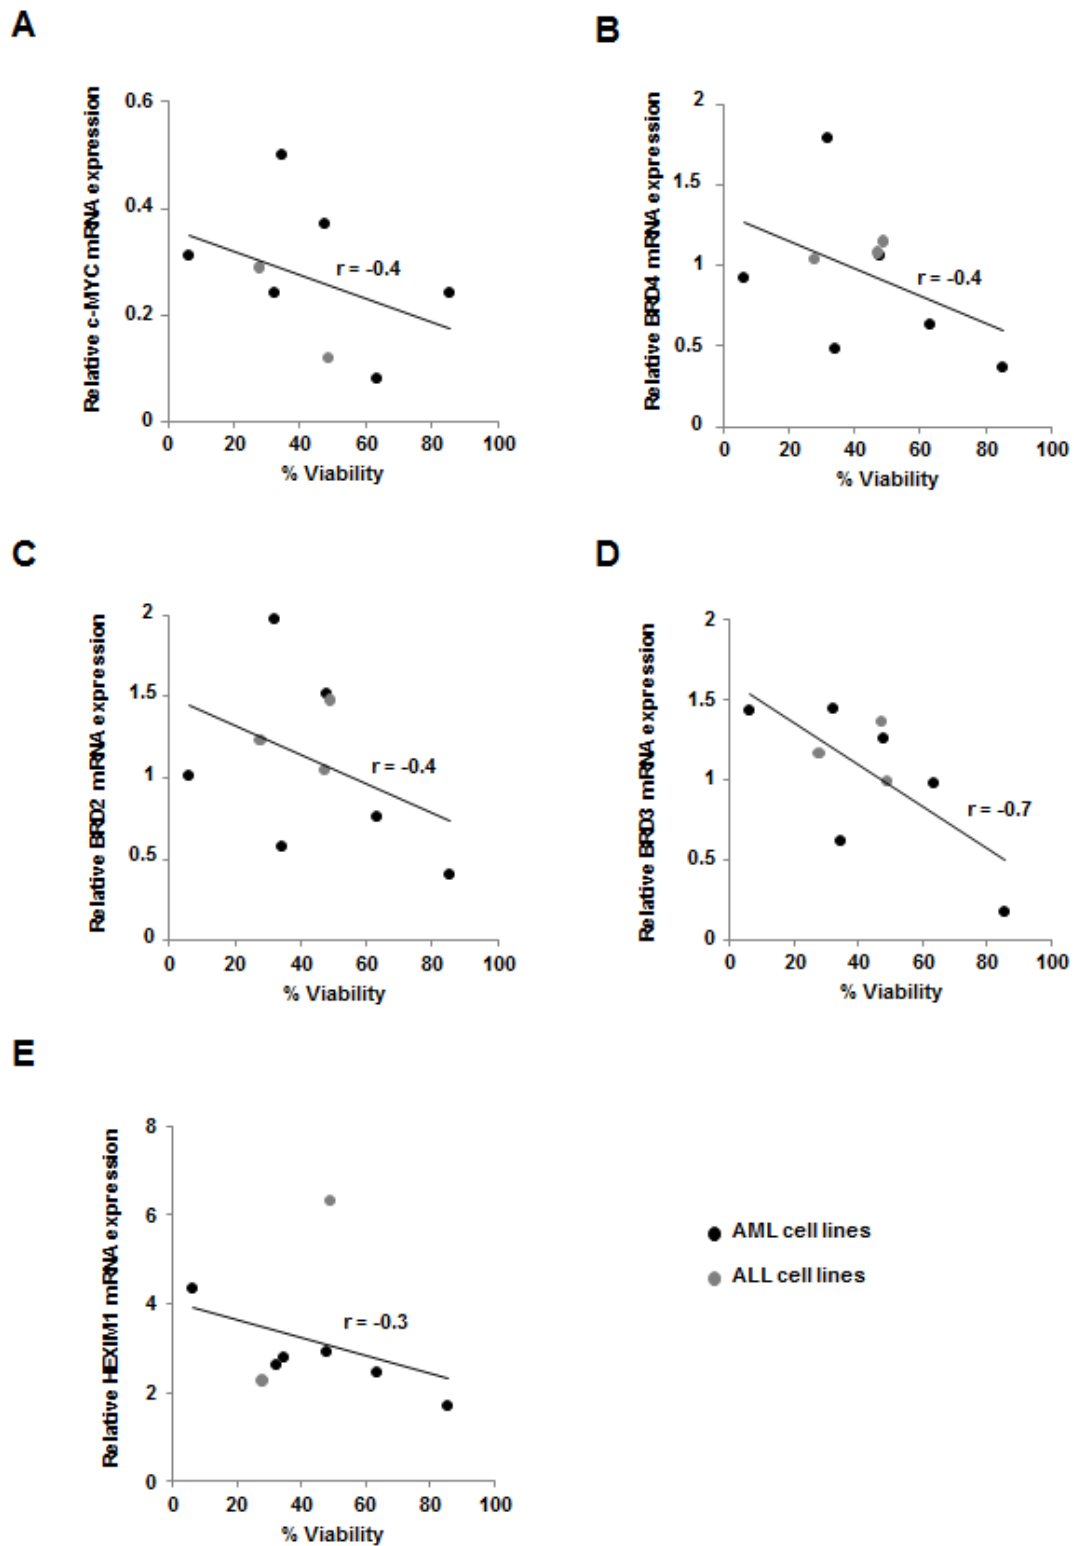

**Supp Figure 3: Correlation between cell viability and mRNA expression of selected genes.** Pearson's correlation test between the percentage of viability in cells treated by 500nM OTX015 and *c-MYC* (A), *BRD4*, *BRD2*, and *BRD3* (B-D), *HEXIM1* (E) mRNA expression.

A

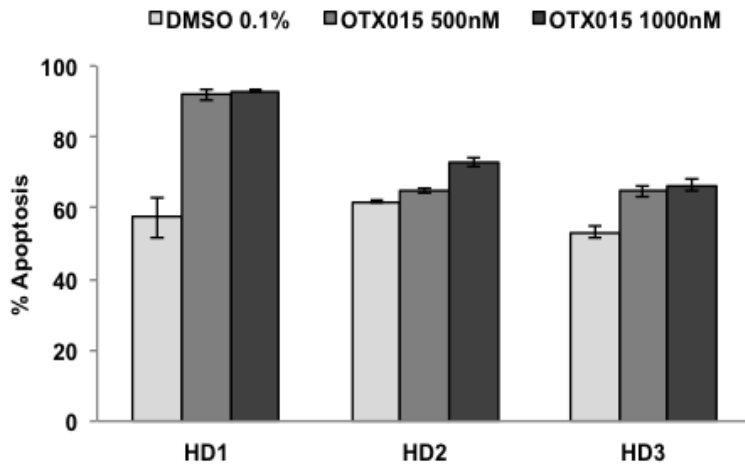

B

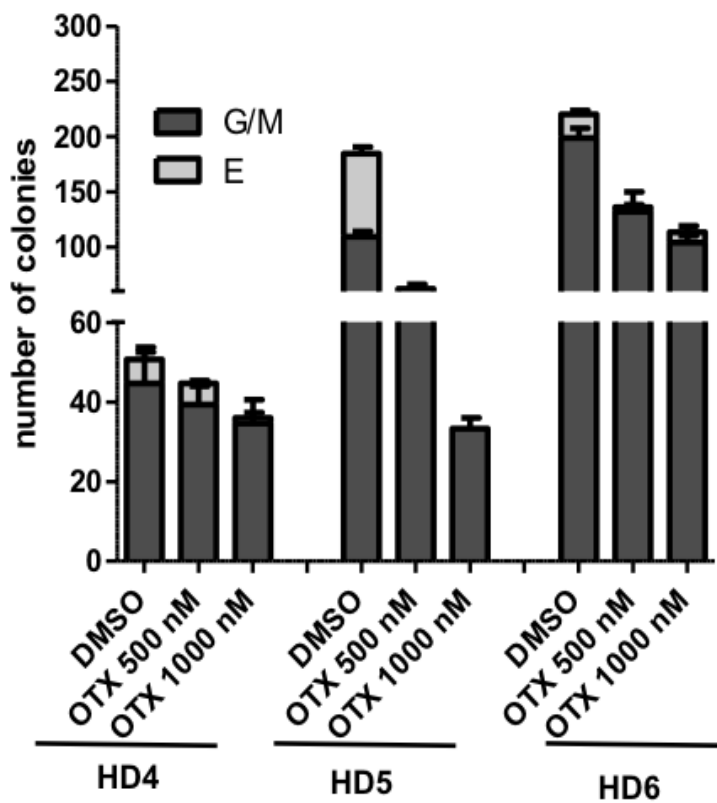

**Supp Figure 4: Apoptosis and clonogenicity in CD34+ cells from healthy donors after exposure to OTX015. (A)** CD34+ cells were exposed for 72h to OTX015 and apoptosis was determined by AnnexinV/PI. **(B)** Clonogenic assays performed in cytokine-supplemented methylcellulose after treatment with OTX015 or DMSO. G/M=Granulocyte/Macrophage; E=Erythroid; HD=healthy donor

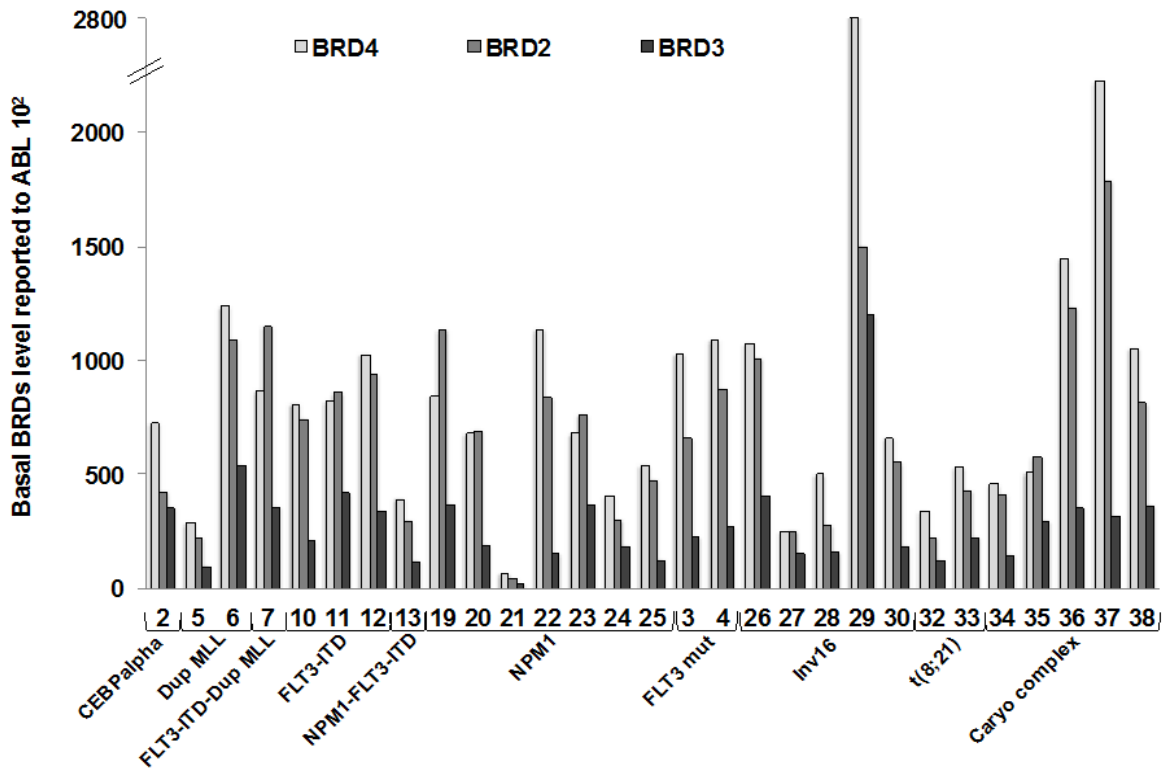

**Supp Figure 5: Basal gene expression of *BRD2/3/4* in AML patient samples.** Expression is shown for 29 AML patient samples. X-axis, patient samples. Y-axis, mRNA quantities, relative to *ABL10*<sup>2</sup>.

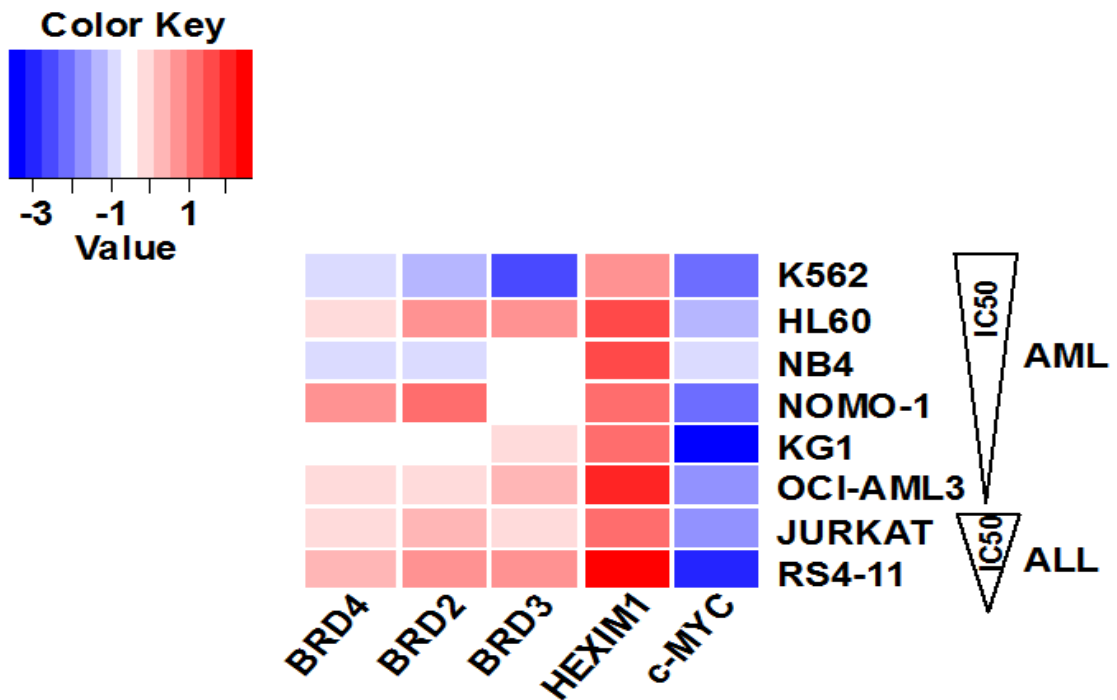

**Supp Figure 6: Heatmap of gene expression after treatment with OTX015 at 500 nM.** Modulation of *c-MYC*, *BRD4*, *BRD2*, *BRD3* and *HEXIM1* after OTX015 exposure at 500 nM. Repression in blue. Overexpression in red.

### Supplementary Methods

Peripheral blood nucleated cells from apheresis products of healthy donors obtained after informed consent were enriched for CD34+ cells by immunomagnetic selection (MACS®, Miltenyi, Germany). Cells were grown in suspension in RPMI medium supplemented with 10% FCS, and 2 million cells were plated in 6-well plates, and treated at day 1 with either DMSO 0.1% or 500nM or 1000nM OTX015. At day 4, cells were numbered, and equal numbers of cells (500 cells/mL of methylcellulose) were seeded in triplicate in methylcellulose (METHOCULT® H4100, Stem Cell Technologies, Grenoble), supplemented with 30% FCS (Stem Cell Technologies, Grenoble) and cytokines: SCF 25 ng/mL, IL-3 10 ng/mL, G-CSF 10 ng/mL, GM-CSF 10 ng/mL and EPO 3 IU/mL (all from Peprotech France, Neuilly sur Seine).
